# Supplementary material for: Cancer Cell-Derived PDGFB Stimulates mTORC1 Activation in Renal Carcinoma
Source: MDPI journal article supplement (doi:10.3390/ijms24076447), 2023-03-29
Supplement: s1 [file s1]

**Supplementary Table S1:** sgRNA sequences, PCR and sequencing primer sequences

| Construct           | Sequence (5'-3')               |
|---------------------|--------------------------------|
| Top sgPDGFB_1       | CACCGGTTGGAGATCATCAAAGGAGGT    |
| Bottom sgPDGFB_1    | TAAACCTCCTTTGATGATCTCCAACC     |
| Top sgPDGFB_2       | CACCGCTGCTGCACGGAGACCCCGGT     |
| Bottom sgPDGFB_2    | TAAACCCGGGGTCTCCGTGCAGCAGC     |
| U6 Promoter Fwd     | GAGGGCCTATTTCCCATGATTCC        |
| EcoRI-PDGFB CDS Fwd | ATCGGAATTCATGAATCGCTGCTGGGCGCT |
| XbaI-PDGFB CDS Rev  | ATCGTCTAGACTAGGCTCCAAGGGTCTCCT |
| pCEP Fwd            | AGAGCTCGTTTAGTGAACCG           |

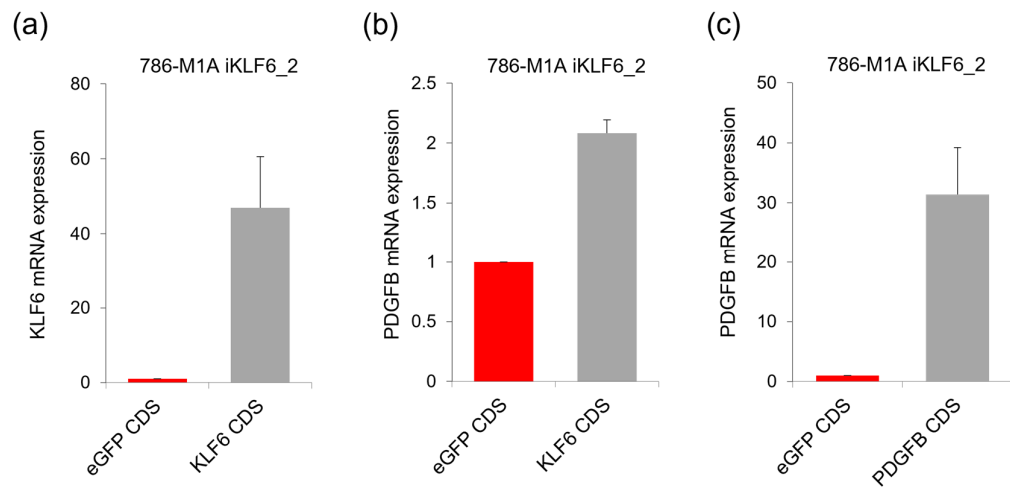

**Supplementary Figure S1: (a-b)** The expression of **(a)** KLF6 and **(b)** PDGFB upon the reintroduction of exogenous KLF6 into the KLF6-repressed 786-M1A cells. **(c)** The expression of PDGFB in the KLF6-repressed 786-M1A cells reintroduced with exogenous PDGFB. Average of three independent experiments. Error bars represent SD.

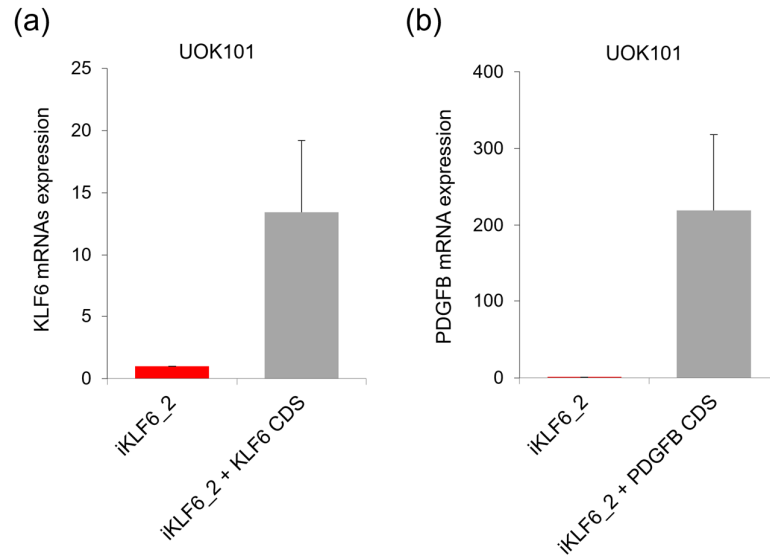

**Supplementary Figure S2: (a-b)** The expression of **(a)** KLF6 and **(b)** PDGFB upon the reintroduction of exogenous KLF6 CDS and PDGFB CDS into the KLF6-repressed UOK101 cells (UOK101 iKLF6\_2), respectively. Average of two independent experiments. Error bars represent SD.

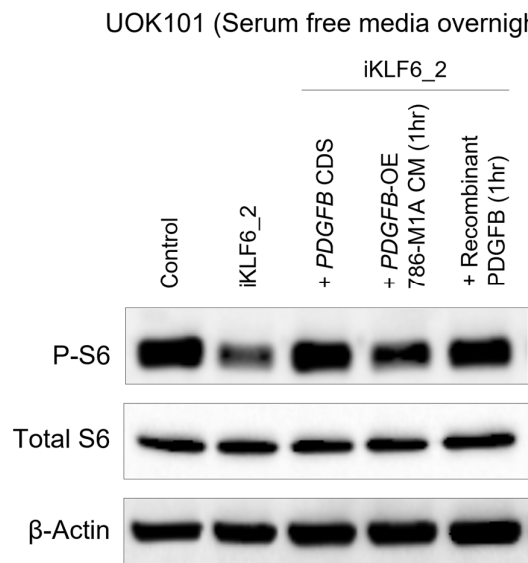

**Supplementary Figure S3:** mTORC1 activity, marked by ribosomal S6 phosphorylation level, of UOK101 control (1st lane), UOK101 iKLF6\_2 (2nd lane), PDGFB CDS-expressing UOK101 iKLF6\_2 (3rd lane), UOK101 iKLF6\_2 that was cultured with PDGFB-overexpressing 786-M1A cells' conditioned media for 1 hour (4th lane) and UOK101 iKLF6\_2 that was cultured with recombinant PDGFB for 1 hour (5th lane). The cells were cultured in serum free media overnight prior to the respective treatment and protein harvesting. Representative of two experiments
